# Supplementary material
Source: PubMed Central journal article supplement (PMC7363493)
Supplement: awaa147_supplementary_materials.pdf [file awaa147_supplementary_materials.pdf]

## SUPPLEMENTARY MATERIALS

**Supplementary Figure 1. Representative wake EEG of *Grin2a* S644G/+ and wildtype +/+ littermates.** No obvious epileptiform activity was observed in traces from at least seven *Grin2a*<sup>S644G/+</sup> mice recorded for 48 hours each.

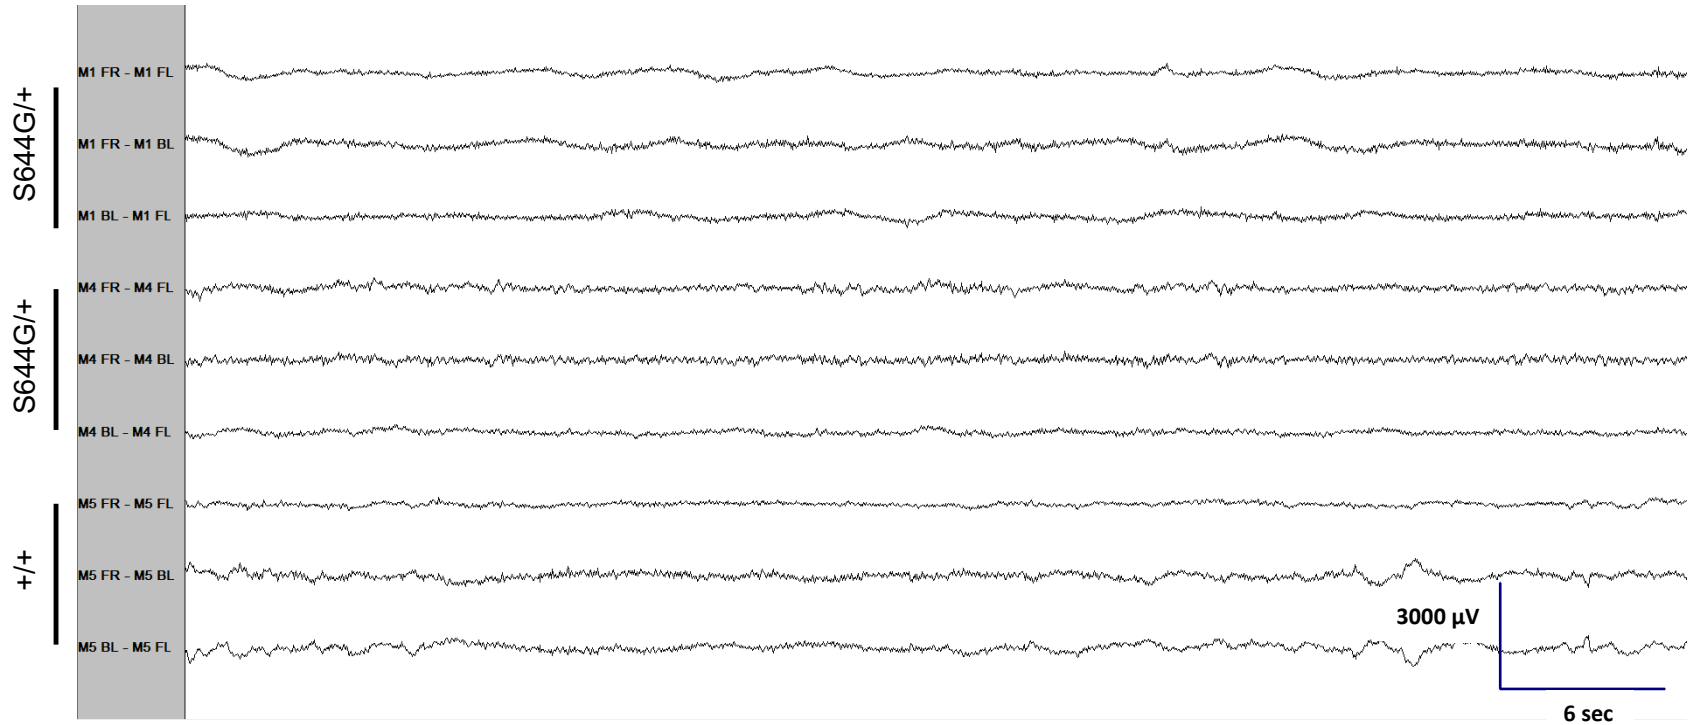

**Supplementary Figure 2. Response of S644G-containing NMDARs to agonists *in vitro*.** (a, b) Fitted composite glutamate and glycine concentration-response curves for diheteromeric human wildtype GluN1/GluN2A- and GluN1/GluN2A-S644G expressed in *Xenopus laevis* oocytes. Two-electrode voltage-clamp recordings were conducted at a holding potential of  $-40$  mV. Glutamate potency was quantified as the half-maximally effective response ( $EC_{50}$ ) of recombinant NMDARs receptors comprised of wild type or mutant GluN2A in the presence of a maximally effective concentration of glycine ( $100$   $\mu$ M). Glycine potency was evaluated in the presence of a maximally effective concentration of glutamate ( $100$   $\mu$ M). (c, d) Fitted concentration-response curves for endogenous antagonists,  $Mg^{2+}$  (at  $-60$  mV) and  $Zn^{2+}$  (at  $-20$  mV) at diheteromeric human GluN1/GluN2A NMDARs. (e) Percentage current response at pH 6.8 versus 7.6 shows decreased current attenuation in the presence of increased proton concentrations. Concentration-response curves were generated for co-agonists glutamate and glycine, channel blocker  $Mg^{2+}$  and endogenous antagonist  $Zn^{2+}$  to evaluate whether the mutation changes agonist potency or the sensitivity to endogenous modulators. (f) Agonist potency shifts by GluN2A-S644G-containing NMDARs *in vitro*. Fitted concentration-response curves for glutamate, in the presence of  $100$   $\mu$ M glycine (a), and glycine in the presence of  $100$   $\mu$ M glutamate (g for NMDARs with 0, 1, or 2 copies of the rat GluN2A-S644G variant in *Xenopus laevis* oocytes. Results are mean  $\pm$  SEM from

12-17 (glutamate) or 13-14 oocytes (glycine) from 2 separate injections. Either 1 or 2 copies of GluN2A-S644G significantly increases both glutamate and glycine potency of NMDA receptors ( $p < 0.05$ , ANOVA, Neuman-Kuels multiple comparison test).

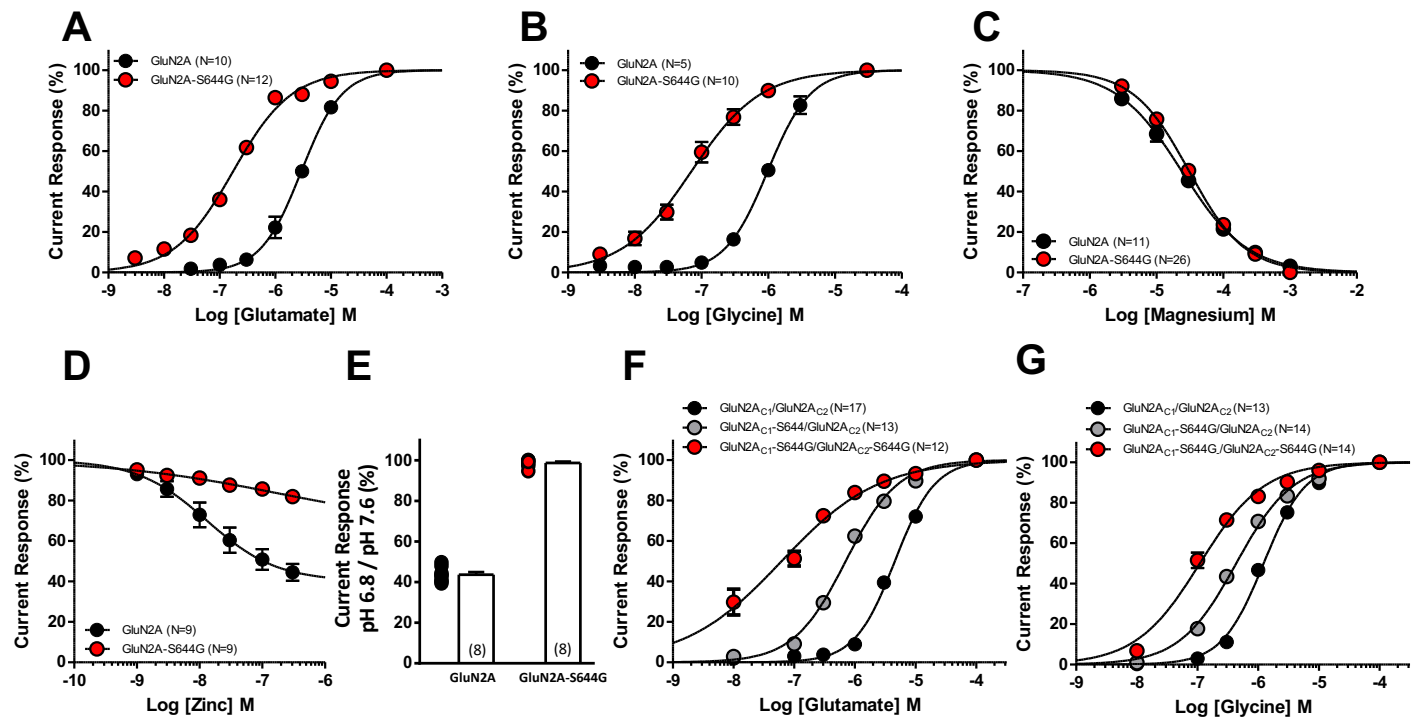

**Supplementary Figure 3. Additional multielectrode array analyses.** (a) Temporal development of number of active electrodes (electrodes recording at least 5 spikes per minute) shows >94% active electrodes for each genotype by DIV13. (b) Mutant networks displayed significantly longer network bursts (NB) relative to wildtype. Error bars in (a) and (b) indicate SEM – statistical tests were done as in Figure 6 and results listed on Supplementary Table 4. (c) Concentration-response curve of NMDA demonstrates sensitivity of mutant networks to NMDA-mediated excitation. Data for each well are normalized to the baseline firing recorded prior to agonist addition. Data were derived from 4 independent cultures with  $\geq 17$  wells for each genotype. (d) Peristimulus time histograms (400 ms) (see Materials and Methods) pre- and post-exposure to specified NMDA concentrations (n=6 wells). At baseline, mutant networks display prolonged evoked burst duration compared to wildtype with a mean AUC of  $450 \pm 10.7$  compared to  $330 \pm 4.9$  for wildtype. NMDA addition decreased evoked burst duration for both wildtype and mutant neurons in a concentration-dependent fashion. 1  $\mu\text{M}$  NMDA; wildtype AUC  $300 \pm 5.4$ , S644G/S644G AUC  $340 \pm 8.8$ . 10  $\mu\text{M}$  NMDA; wildtype AUC  $250 \pm 6.2$  and S644G/S644G  $140 \pm 4.7$ .

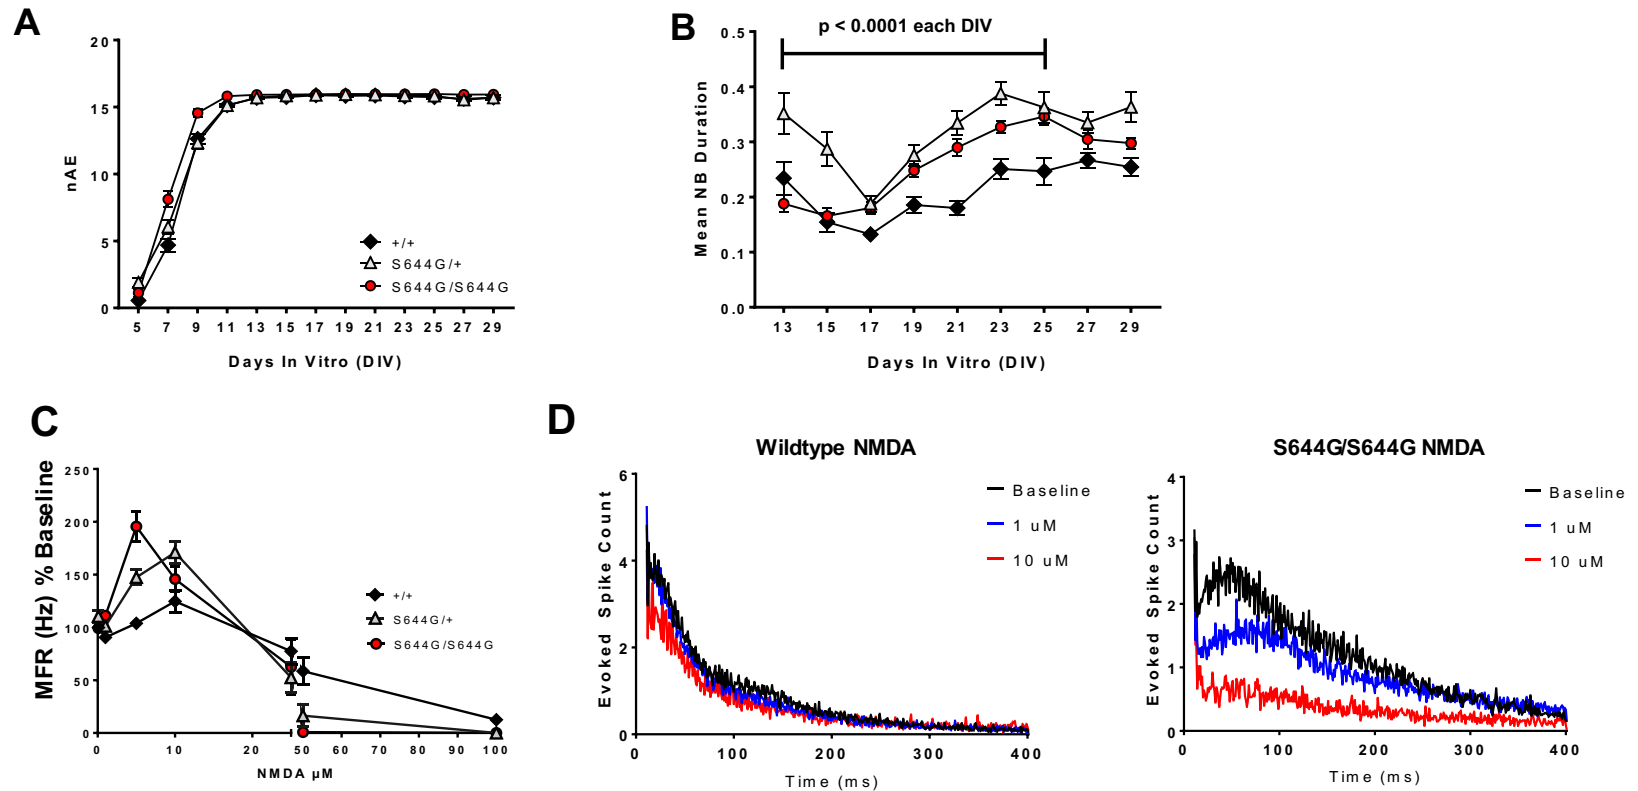

**Supplementary Figure 4.** Western blot of whole brain lysates probed for GluN2B, GluN2A, PSD95,  $\beta$ 3-tubulin (N=3). Uncropped images corresponding of those shown in Figure 1d. (a) GRIN2B, (B) GRIN2A, (c) PSD95, (d)  $\beta$ -tubulin. Biological replicates (separate mice) are shown as 1, 2, 3.

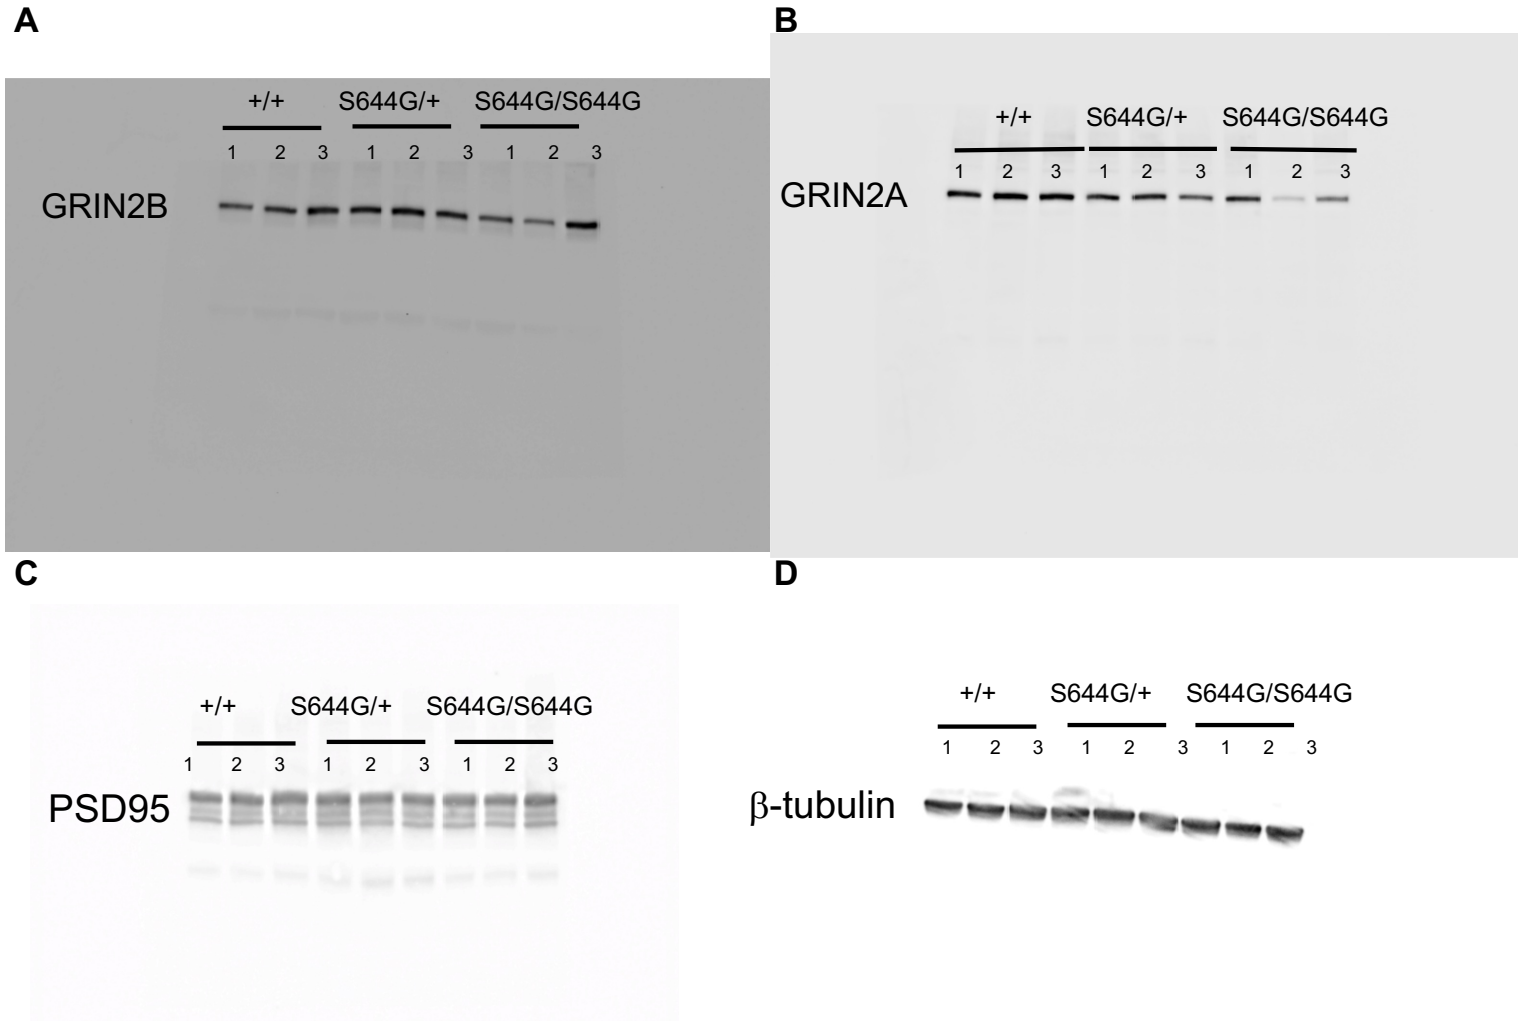

Supplementary Table 1. Pharmacological and functional properties of NMDARs containing GluN2A-S644G subunits

| TEVC, oocytes                           | GluN1/GluN2A <sub>C1</sub> /GluN2A <sub>C2</sub> | GluN1/GluN2A <sub>C1</sub> -S644G/GluN2A <sub>C2</sub> | GluN1/GluN2A <sub>C1</sub> -S644G/GluN2A <sub>C2</sub> -S644G |
|-----------------------------------------|--------------------------------------------------|--------------------------------------------------------|---------------------------------------------------------------|
| <b>Glu EC<sub>50</sub></b>              | 4.5 μM (17; 4.0, 5.1)                            | 0.71 μM (13; 0.58, 0.88) <sup>^</sup>                  | 0.046 μM (12; 0.017, 0.12) <sup>^</sup>                       |
| <b>Gly EC<sub>50</sub></b>              | 1.2 μM (13; 1.0, 1.5)                            | 0.44 μM (14; 0.32, 0.61) <sup>^</sup>                  | 0.11 μM (14; 0.0081, 0.15) <sup>^</sup>                       |
| <b>Dextromethorphan IC<sub>50</sub></b> | 13 μM (10; 11, 16)                               | 25 μM (11; 20, 29) <sup>^</sup>                        | 22 μM (13; 19, 25) <sup>^</sup>                               |
| <b>Memantine IC<sub>50</sub></b>        | 4.4 μM (20; 3.0, 6.6)                            | 24 μM (10; 18, 34) <sup>^</sup>                        | 30 μM (11; 20, 44) <sup>^</sup>                               |
| Patch clamp, HEK cells                  | GluN1/GluN2A <sub>C1</sub> /GluN2A <sub>C2</sub> | GluN1/GluN2A <sub>C1</sub> -S644G/GluN2A <sub>C2</sub> | GluN1/GluN2A <sub>C1</sub> -S644G/GluN2A <sub>C2</sub> -S644G |
| <b>Amplitude (peak)</b>                 | 57 ± 21 pA/pF                                    | 22 ± 5 pA/pF                                           | 36 ± 16 pA/pF                                                 |
| <b>Rise time</b>                        | 9.9 ± 2.0 ms                                     | 9.0 ± 1.4 ms                                           | 8.8 ± 1.5 ms                                                  |
| <b>t<sub>FAST</sub> deactivation</b>    | 55 ± 4.6 ms                                      | 231 ± 38 ms                                            | 547 ± 156 ms                                                  |
| <b>t<sub>SLOW</sub> deactivation</b>    | --                                               | 1040 ± 253 ms                                          | 2130 ± 415 ms                                                 |
| <b>t<sub>FAST</sub> amplitude</b>       | 100 %                                            | 72                                                     | 66 %                                                          |
| <b>t<sub>w</sub></b>                    | 55 ± 4.6 ms                                      | 456 ± 84 <sup>*</sup>                                  | 1220 ± 264 <sup>*, #</sup>                                    |
| <b>Charge transfer</b>                  | 2550 ± 691 pA ms/pF                              | 10250 ± 3120 <sup>*</sup> pA ms/pF                     | 31000 ± 13100 <sup>*</sup> pA ms/pF                           |
| <b>n</b>                                | 14                                               | 8                                                      | 9                                                             |
| MEA, cultured neurons                   | WT                                               | S644G/+                                                | S644G/+                                                       |
| <b>Memantine IC<sub>50</sub></b>        | 4.5 μM (29; 3.9, 5.2)                            | 3.4 μM (46; 2.9, 3.9)                                  | 2.1 μM (4; 1.5, 2.8) <sup>*</sup>                             |
| <b>Dextromethorphan IC<sub>50</sub></b> | 2.4 μM (26; 1.9, 2.8)                            | 3.0 μM (27; 2.5, 3.6)                                  | 5.5 μM (12; 4.1, 6.6) <sup>*</sup>                            |

Potency data for receptors with the indicated subunits are expressed as mean (n; 95% CI determined from log EC<sub>50</sub> and IC<sub>50</sub> values). <sup>^</sup> = non-overlapping confidence intervals. Functional data are mean ± SEM. -- indicates not detected, <sup>\*</sup>=p<0.05 by one-way ANOVA for log (tau weighted, t<sub>w</sub>) and charge transfer compared to WT/WT; <sup>#</sup>=p<0.05 by one-way ANOVA for t<sub>w</sub> compared to S644G/WT, Tukey's post-hoc analysis. Power to detect an effect size of 3 (e.g. a 2-fold change) was 0.99 for t<sub>w</sub> and 1.5 for charge transfer was 0.98 (G\*Power 3.0.10)

Supplementary Table 2. Statistical analyses of MEA activity phenotypes

| DIV   | <u>Firing Rate</u>  |              |                        |                           | <u>Bursts per minute</u> |              |                    |                           |
|-------|---------------------|--------------|------------------------|---------------------------|--------------------------|--------------|--------------------|---------------------------|
|       | <u>Plate effect</u> |              | <u>Genotype effect</u> |                           | <u>Plate</u>             |              | <u>Genotype</u>    |                           |
|       | <u>p-val</u>        | <u>p-val</u> | <u>p-val adj.†</u>     | <u>vs. wt<sup>^</sup></u> | <u>raw only</u>          | <u>p-val</u> | <u>p-val adj.†</u> | <u>vs. wt<sup>^</sup></u> |
| DIV9  | 9.29E-30            | 6.02E-02     | ns                     |                           | 3.34E-25                 | 3.75E-06     | 4.12E-05           | hom                       |
| DIV11 | 3.86E-19            | 8.06E-05     | 8.86E-04               | hom het                   | 6.92E-20                 | 1.26E-05     | 1.38E-04           | hom                       |
| DIV13 | 4.65E-19            | 1.98E-09     | 2.18E-08               | hom het                   | 7.10E-19                 | 2.08E-11     | 2.29E-10           | hom het                   |
| DIV15 | 1.40E-20            | 3.83E-10     | 4.21E-09               | hom het                   | 4.89E-16                 | 1.39E-12     | 1.53E-11           | hom het                   |
| DIV17 | 2.94E-27            | 3.63E-09     | 3.99E-08               | hom het                   | 8.88E-10                 | 1.68E-11     | 1.85E-10           | hom het                   |
| DIV19 | 6.34E-11            | 7.33E-10     | 8.06E-09               | hom het                   | 1.10E-07                 | 1.23E-08     | 1.35E-07           | hom het                   |
| DIV21 | 5.50E-24            | 1.75E-06     | 1.93E-05               | hom het                   | 6.57E-21                 | 3.33E-11     | 3.66E-10           | hom het                   |
| DIV23 | 5.92E-15            | 6.63E-02     | ns                     |                           | 1.79E-07                 | 9.88E-11     | 1.09E-09           | hom het                   |
| DIV25 | 1.93E-06            | 1.11E-01     | ns                     |                           | 4.20E-09                 | 1.84E-07     | 2.02E-06           | hom het                   |
| DIV27 | 9.75E-08            | 1.41E-03     | 1.55E-02               | hom                       | 6.79E-10                 | 4.74E-03     | ns                 |                           |
| DIV29 | 1.53E-02            | 4.43E-01     | ns                     |                           | 1.29E-04                 | 7.23E-01     | ns                 |                           |

  

| DIV   | <u>Mutual Information</u> |              |                        |                           | <u>Network Burst Duration</u> |              |                    |                           |
|-------|---------------------------|--------------|------------------------|---------------------------|-------------------------------|--------------|--------------------|---------------------------|
|       | <u>Plate effect</u>       |              | <u>Genotype effect</u> |                           | <u>Plate</u>                  |              | <u>Genotype</u>    |                           |
|       | <u>p-val</u>              | <u>p-val</u> | <u>p-val adj.†</u>     | <u>vs. wt<sup>^</sup></u> | <u>raw only</u>               | <u>p-val</u> | <u>p-val adj.†</u> | <u>vs. wt<sup>^</sup></u> |
| DIV9  | 1.46E-17                  | 1.78E-12     | 1.96E-11               | hom                       | 9.07E-26                      | 9.74E-01     | ns                 |                           |
| DIV11 | 6.47E-14                  | 2.89E-17     | 3.18E-16               | hom                       | 1.00E-23                      | 1.54E-01     | ns                 |                           |
| DIV13 | 3.27E-09                  | 2.60E-23     | 2.86E-22               | hom                       | 3.75E-10                      | 1.31E-07     | 1.44E-06           | hom het                   |
| DIV15 | 5.20E-14                  | 5.98E-11     | 6.58E-10               | hom                       | 7.31E-05                      | 3.71E-09     | 4.08E-08           | hom het                   |
| DIV17 | 2.54E-06                  | 5.09E-11     | 5.60E-10               | hom                       | 1.27E-06                      | 6.33E-09     | 6.96E-08           | hom het                   |
| DIV19 | 2.02E-15                  | 5.57E-05     | 6.12E-04               | hom                       | 1.62E-12                      | 5.81E-10     | 6.39E-09           | hom het                   |
| DIV21 | 1.47E-08                  | 4.50E-05     | 4.95E-04               | hom                       | 5.35E-06                      | 1.38E-18     | 1.52E-17           | hom het                   |
| DIV23 | 1.99E-12                  | 4.00E-05     | 4.40E-04               | hom                       | 4.29E-09                      | 6.18E-13     | 6.80E-12           | hom het                   |
| DIV25 | 2.54E-08                  | 5.01E-01     | ns                     |                           | 2.17E-13                      | 5.34E-07     | 5.88E-06           | hom het                   |
| DIV27 | 4.51E-10                  | 4.14E-02     | ns                     |                           | 3.89E-07                      | 1.23E-03     | 1.35E-02           | hom het                   |
| DIV29 | 1.44E-09                  | 7.93E-04     | 8.72E-03               | hom                       | 8.05E-08                      | 4.15E-04     | 4.57E-03           | hom het                   |

†Bonferroni adjustment: p-value x 11 (number of DIV's evaluated for each feature)

^Post-hoc Dunnet's test for hom vs wt or het vs wt, p &lt; 0.05
